# Supplementary material for: Differences in Osteoimmunological Biomarkers Predictive of Psoriatic Arthritis among a Large Italian Cohort of Psoriatic Patients
Source: Int J Mol Sci. 2019 Nov 10;20(22):5617. doi: 10.3390/ijms20225617 (PMC6888436; doi:10.3390/ijms20225617)

# Supplementary material

**Figure S1:** Roc Curve Analyses of both single markers and their combinations in patients undergone to systemic therapy.

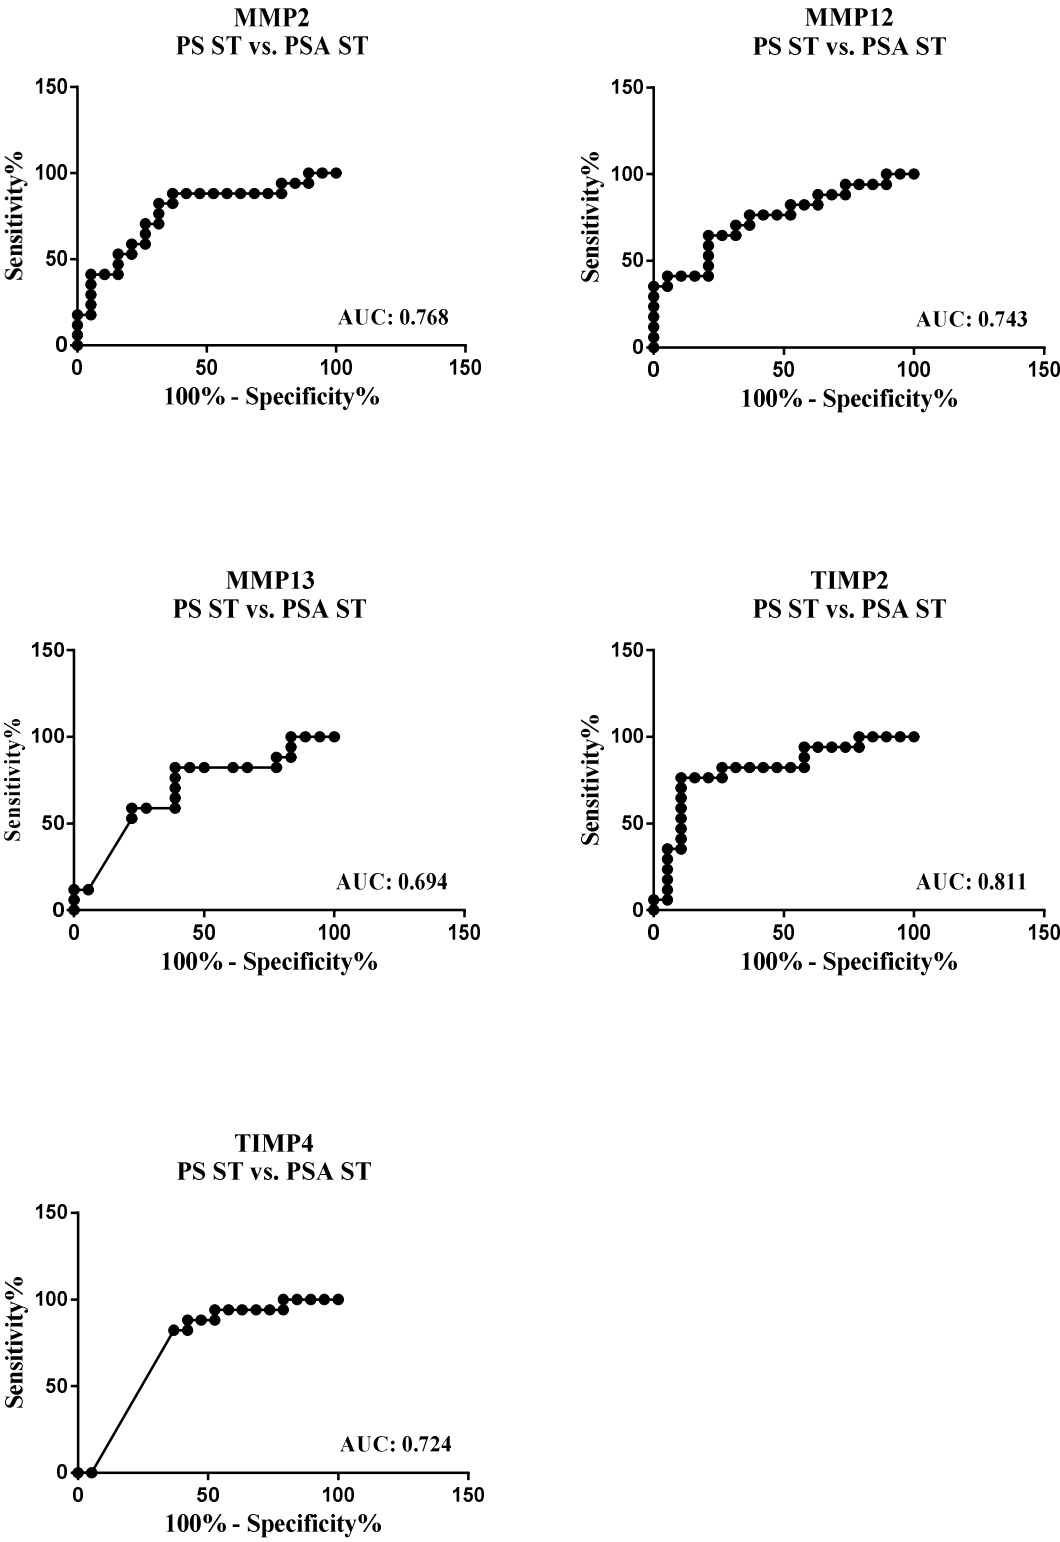

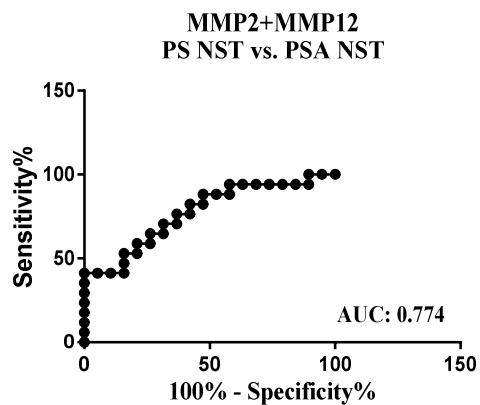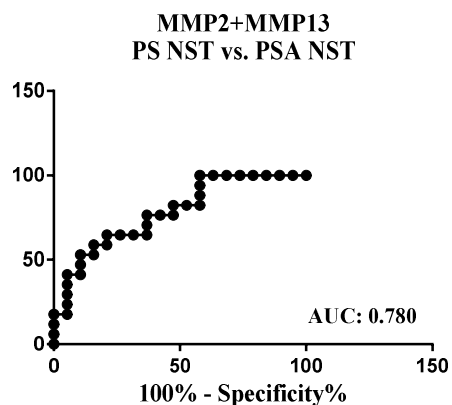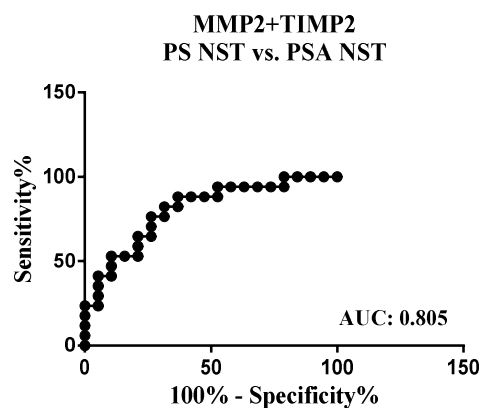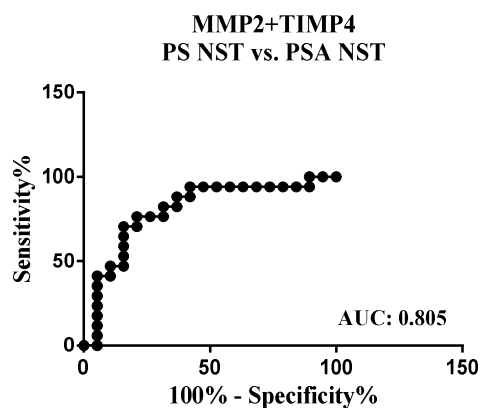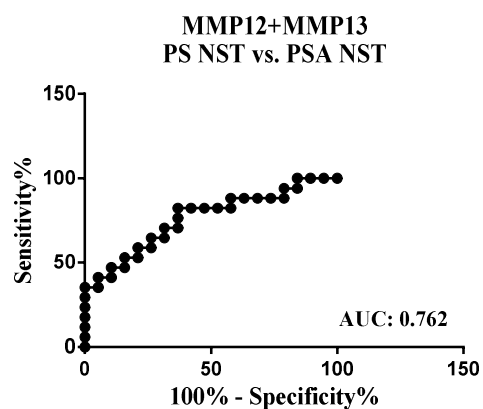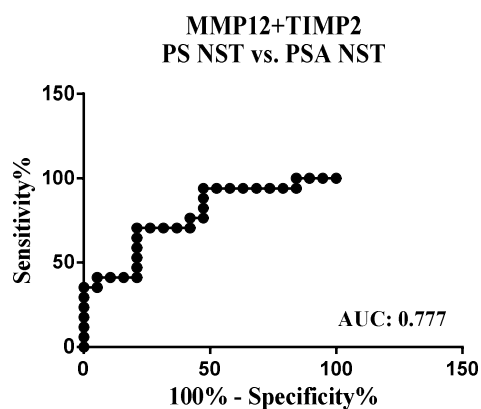

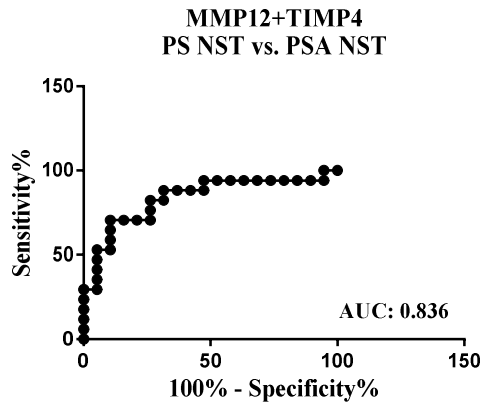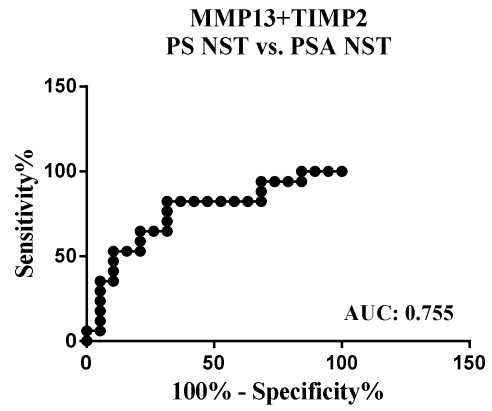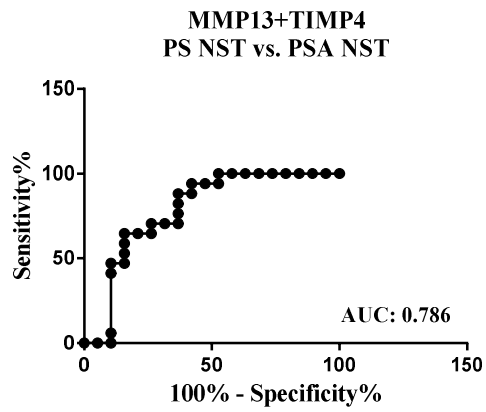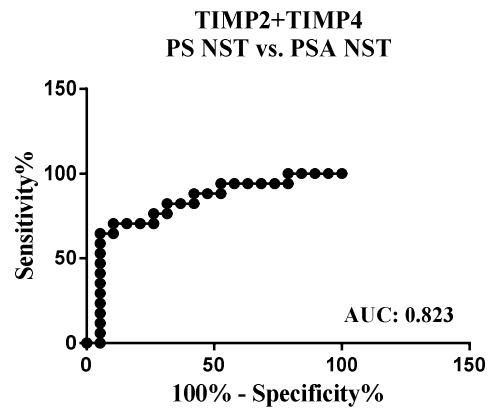

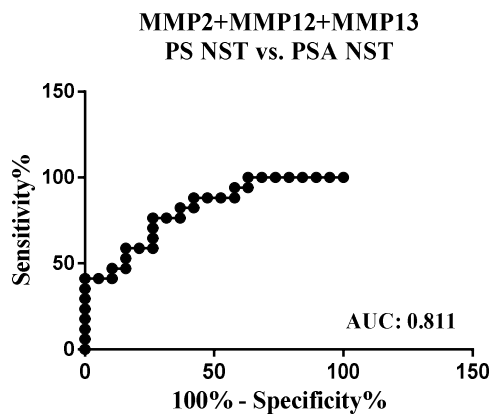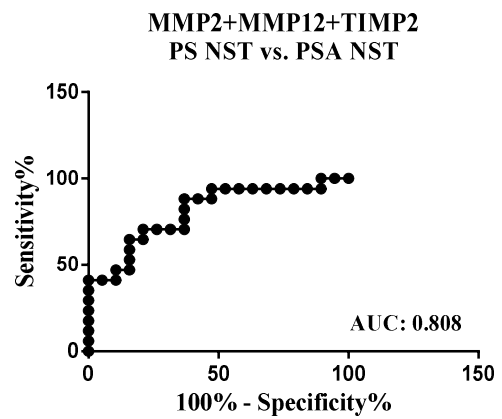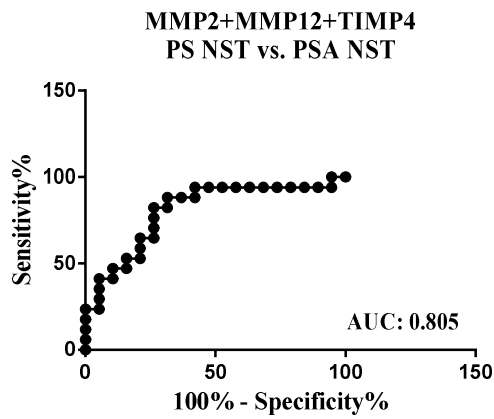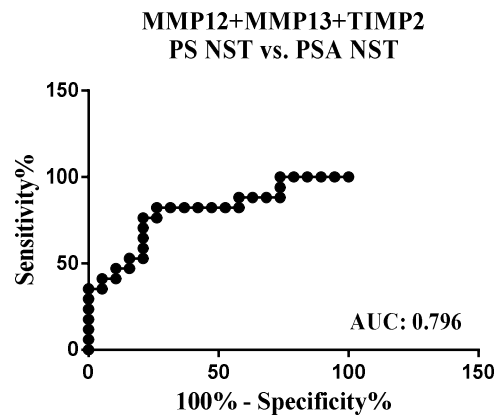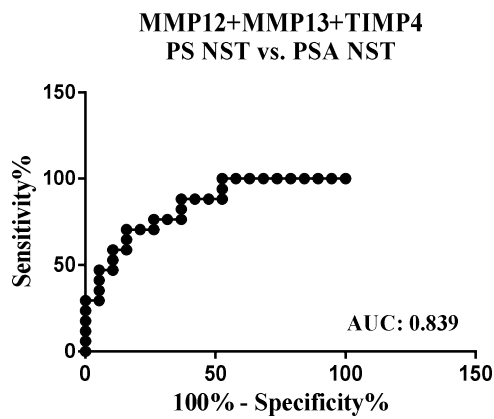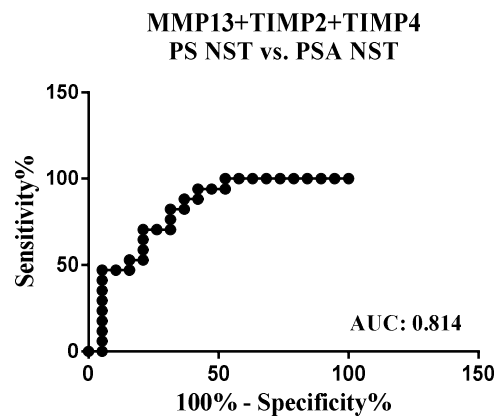

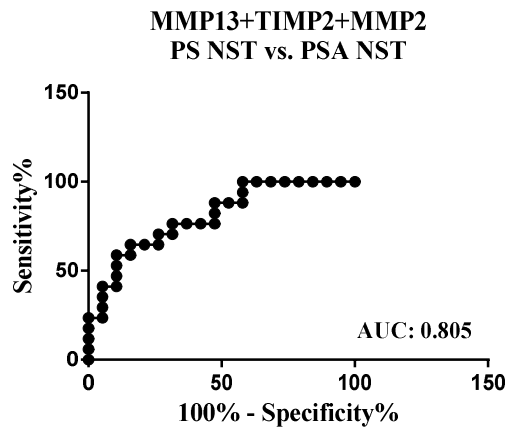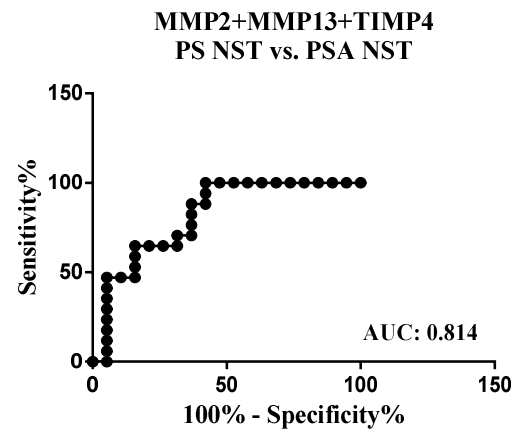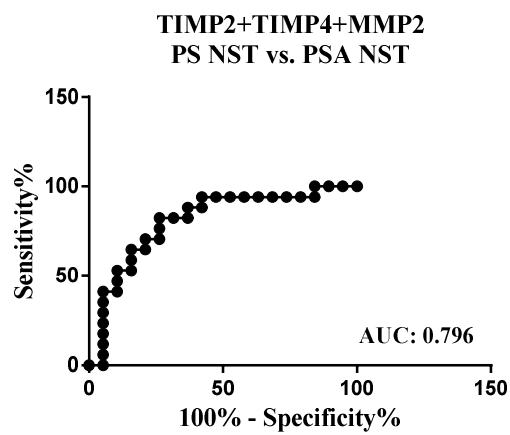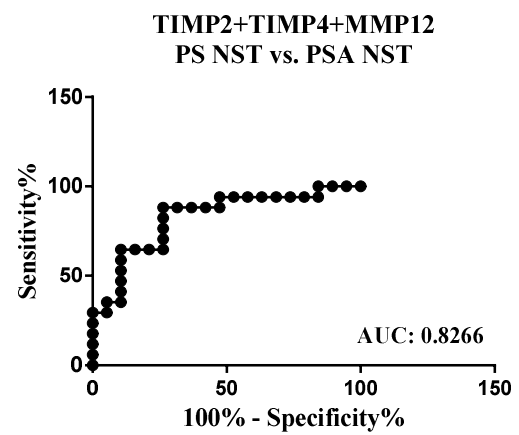

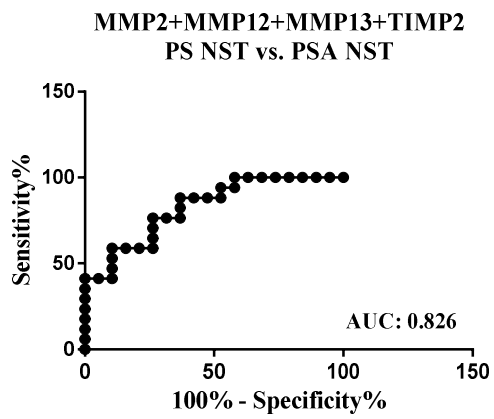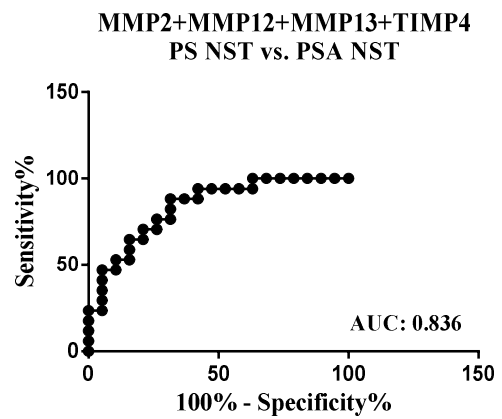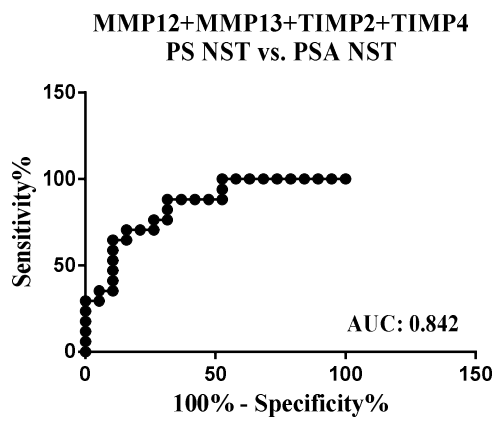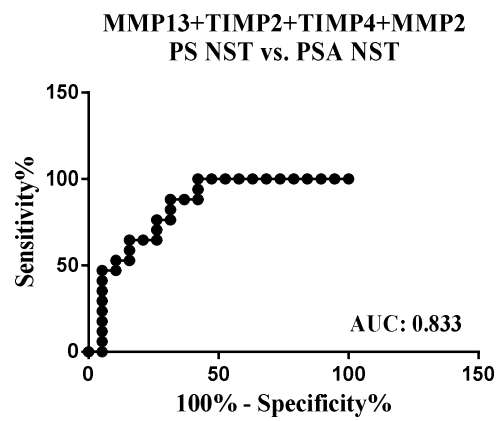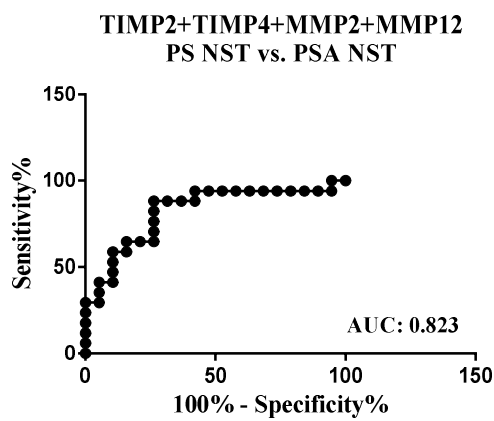

**TIMP2+TIMP4+  
MMP2+MMP12+MMP13  
PS NST vs. PSA NST**

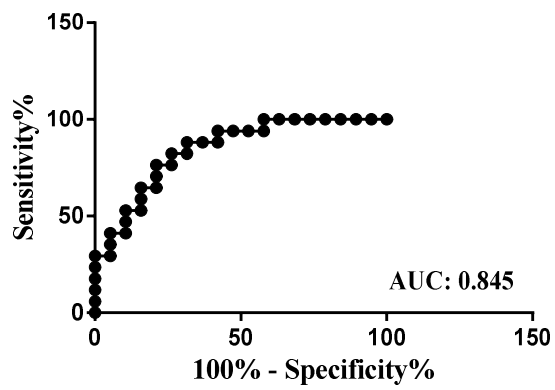

**Figure S2:** ROC Curve Analysis of both single markers and their combinations in patients not systemically treated.

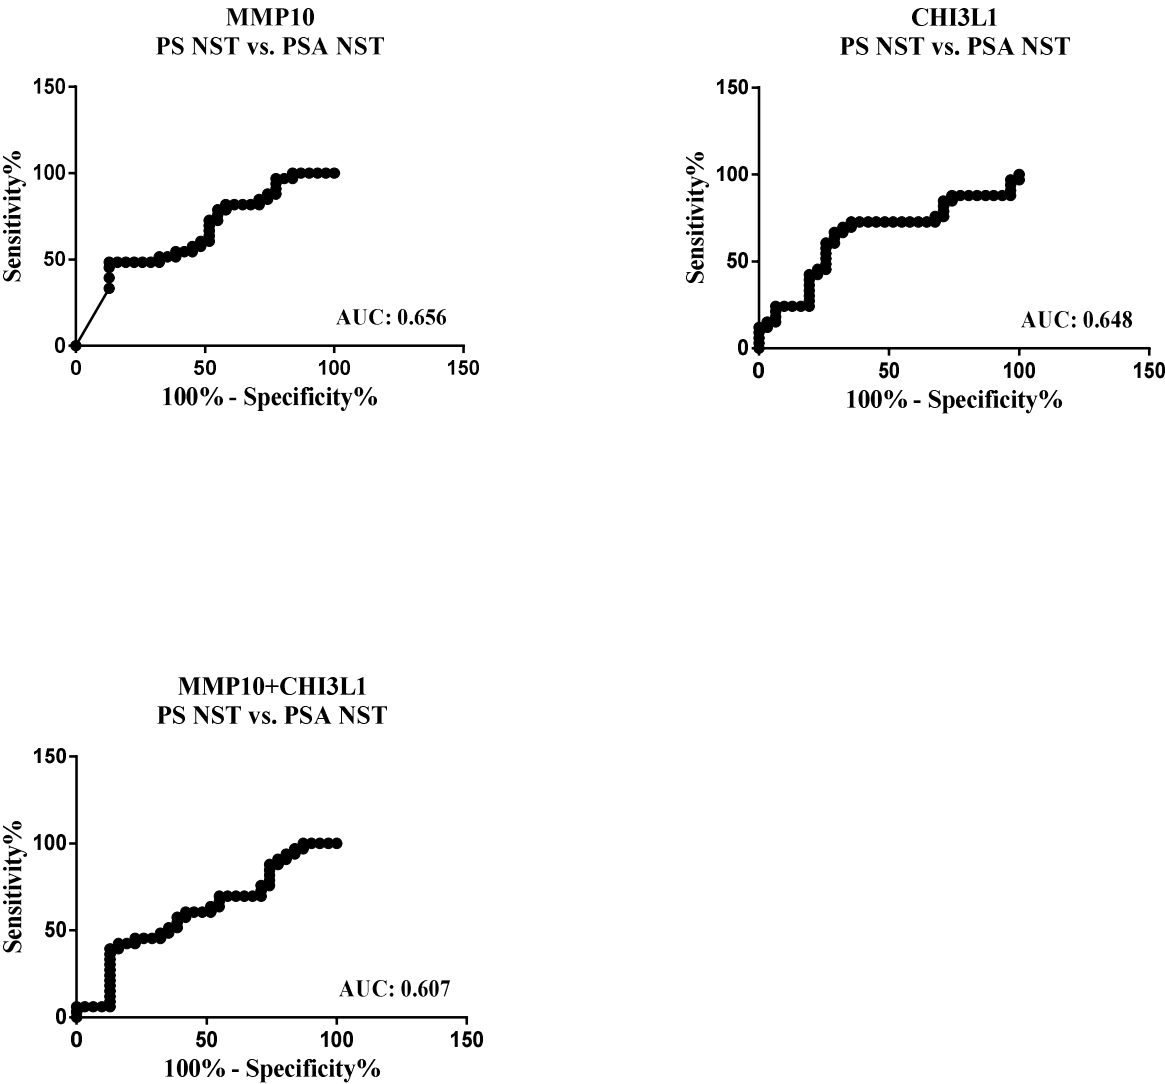

**Figure S3:** ROC Curve Analysis of MMP8 in patients with onychopathy.

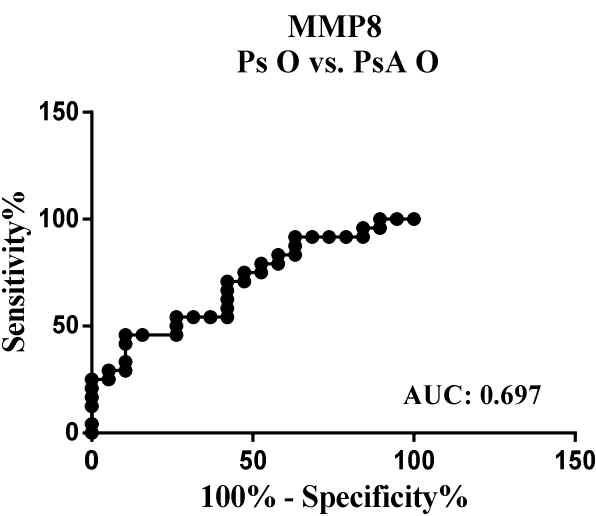

Supplement: Supplementary file 1 [file ijms-20-05617-s001.pdf]
